# Supplementary material for: Donor colonic CD103+ dendritic cells determine the severity of acute graft-versus-host disease
Source: PubMed Central journal article supplement — J Exp Med. 2015 Jul 27;212(8):1303–21. doi: 10.1084/jem.20150329 (PMC4516799; doi:10.1084/jem.20150329), 2015-07-27
Supplement: supp_jem.20150329_JEM_20150329_sm.pdf [file supp_jem.20150329_JEM_20150329_sm.pdf]

## SUPPLEMENTAL MATERIAL

Koyama et al., <http://www.jem.org/cgi/content/full/jem.20150329/DC1>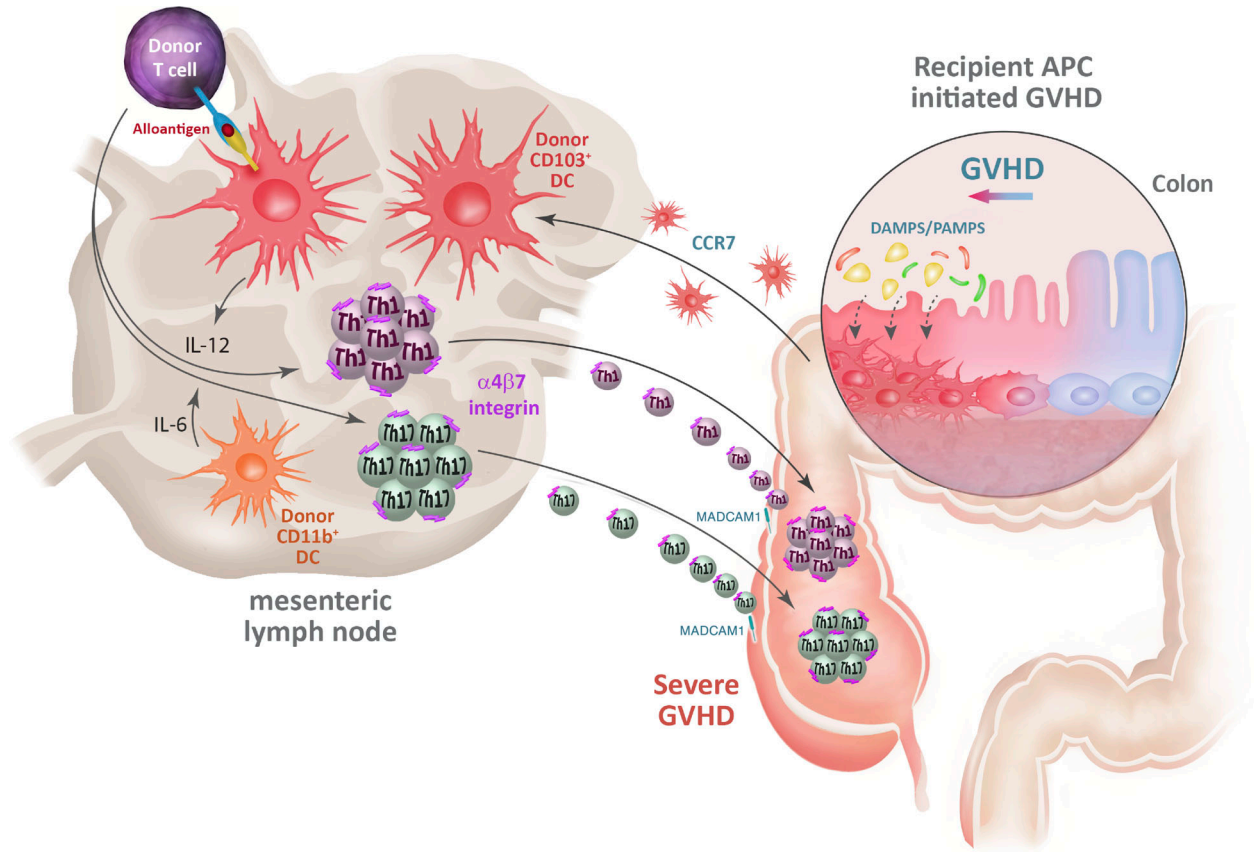

**Figure S1. Proposed feed-forward cascade of indirect alloantigen presentation in the GI tract during acute GVHD.** Acute GVHD is initiated by recipient APCs, which initiates damage in the GI tract and disrupts mucosal integrity. Lumen-derived DAMPs/PAMPs then induce expansion, indirect alloantigen presentation, and cytokine secretion by CD103<sup>+</sup>CD11b<sup>-</sup> donor DCs, which subsequently migrate into the mLN under the guidance of CCR7. Within the mLN, the CD103<sup>+</sup>CD11b<sup>-</sup> DCs present high levels of alloantigen to incoming donor T cells and secrete IL-12 to drive T cell expansion and Th1 cell differentiation, respectively. Donor CD11b<sup>+</sup> DCs are one source of IL-6 that promotes Th17 cell differentiation. Alloantigen presentation by CCR7-dependent donor DCs in the mLN results in the expression of the α4β7 integrin by differentiating donor T cells to allow emigration into the GI tract to invoke severe GVHD.

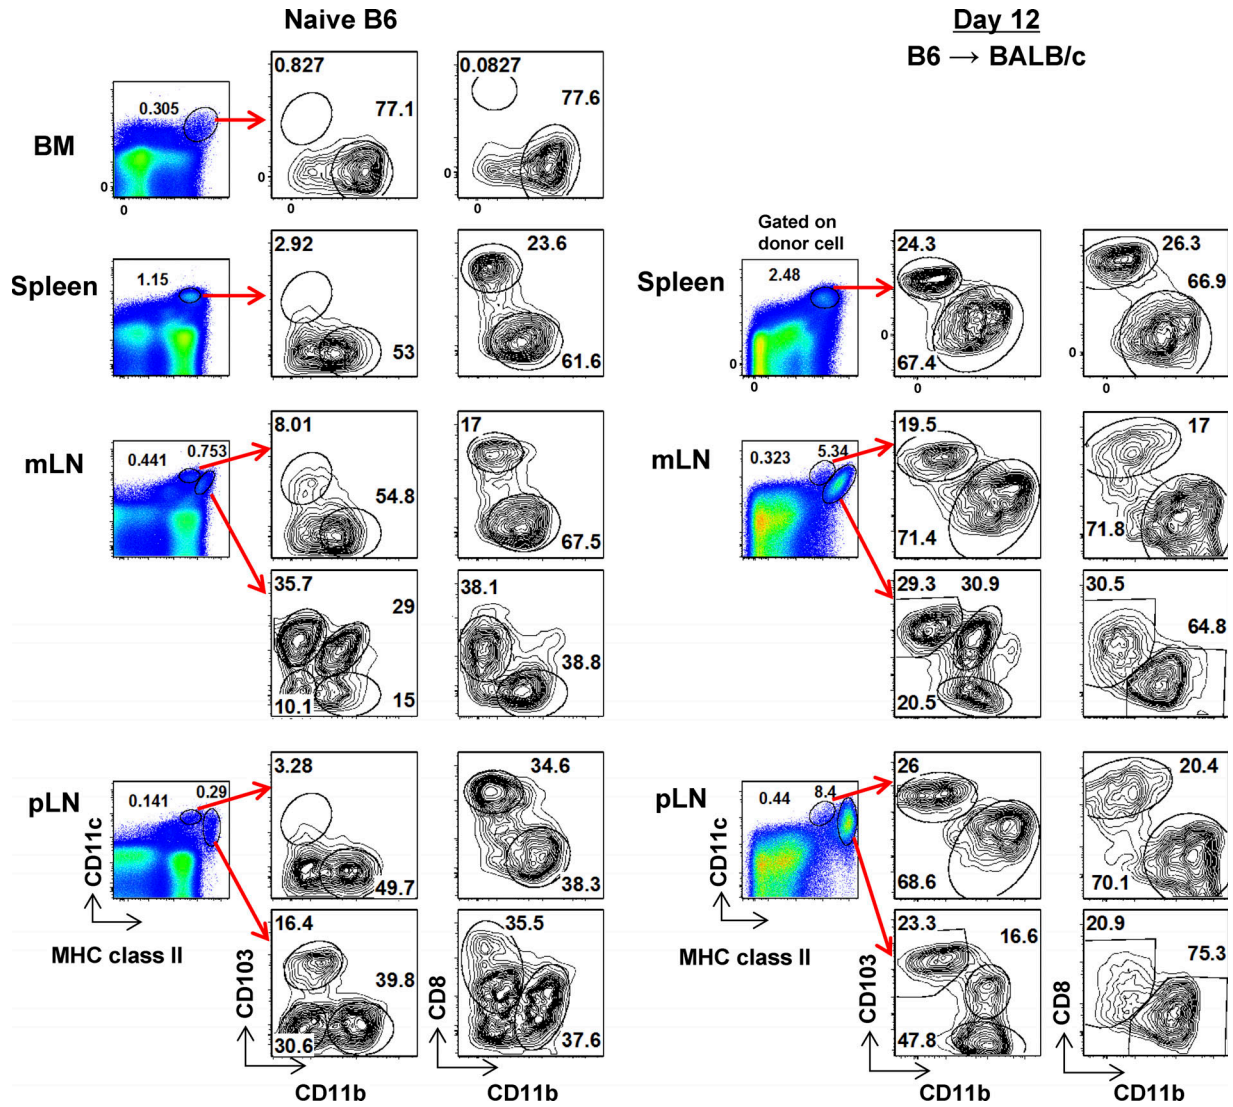

Figure S2. Gating of DC subsets in naive B6 mice and BMT recipients of B6 grafts. Representative FACS plots are shown for DCs from naive B6 and BALB/c recipients transplanted with BM and T cells from B6 (CD45.1<sup>+</sup>) donor mice on day 12 after BMT. Data shown are representative of two replicate experiments.
